# Supplementary material
Source: PubMed Central journal article supplement (PMC7294594)
Supplement: NIHMS1591079-supplement-SupportInfo.pdf [file NIHMS1591079-supplement-SupportInfo.pdf]

## **Supporting Information for**

Free Base Porphyrins as CEST MRI Contrast Agents with Highly Upfield Shifted Labile Protons

Xiaoxiao Zhang, Yaping Yuan, Sha Li, Qingbin Zeng, Qianni Guo, Na Liu, Minghui Yang, Yunhuang Yang, Maili Liu, Michael T. McMahon and Xin Zhou\*

\*Corresponding author: Email: [xinzhou@wipm.ac.cn](mailto:xinzhou@wipm.ac.cn)

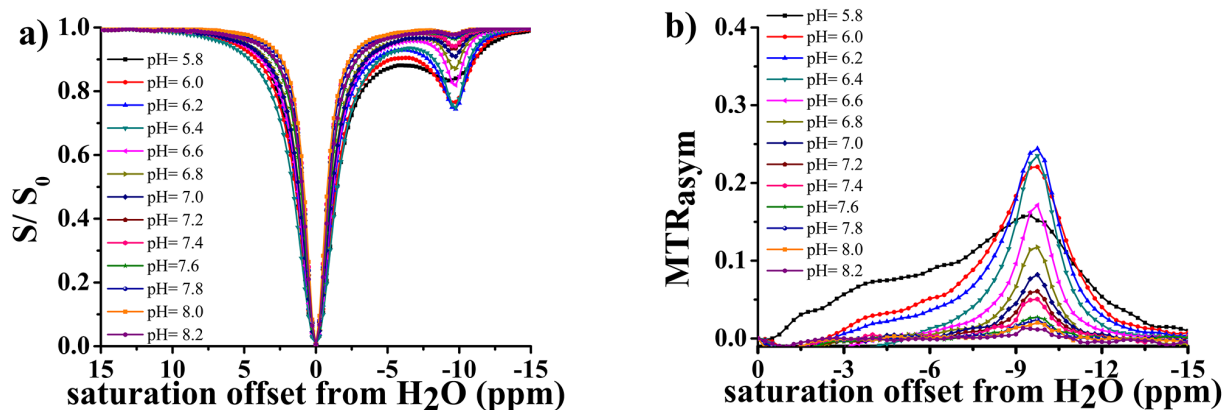

**Supporting Information Figure S1** Influence of pH on the contrast of TPPS<sub>4</sub> ( $\omega_1 = 5.4 \mu T$ ,  $t_{sat} = 3$  s, 12.5 mM).

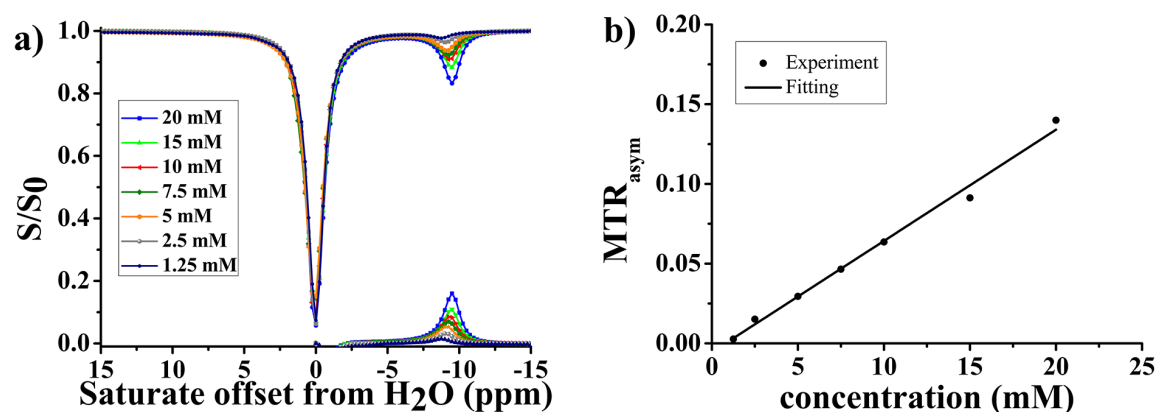

**Supporting Information Figure S2** Influence of concentration on the contrast of TPPS<sub>4</sub>. The concentration dependence of the contrast of TPPS<sub>4</sub> at pH 7.0-7.2 was measured at a saturation field strength ( $\omega_1$ ) = 5.4  $\mu T$ . The Z-spectra and  $MTR_{asym}$  spectra at concentrations 0 mM, 1.25 mM, 2.5 mM, 5 mM, 7.5 mM, 10 mM, 15 mM and 20 mM were collected and are shown below. 1.5% contrast was obtained at 2.5 mM.

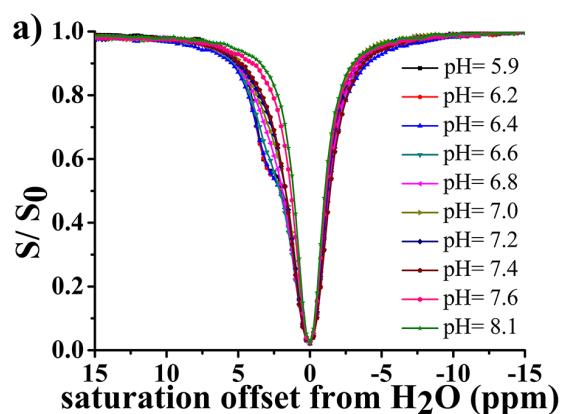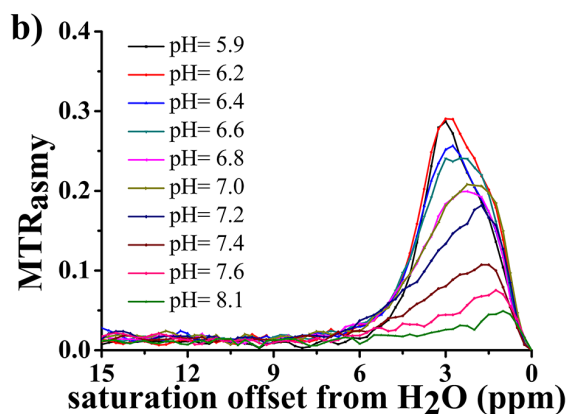

**Supporting Information Figure S3** Influence of pH on the contrast of porphobilinogen ( $\omega_1 = 5.4 \mu\text{T}$ ,  $t_{\text{sat}} = 3 \text{ s}$ ,  $12.5 \text{ mM}$ ).

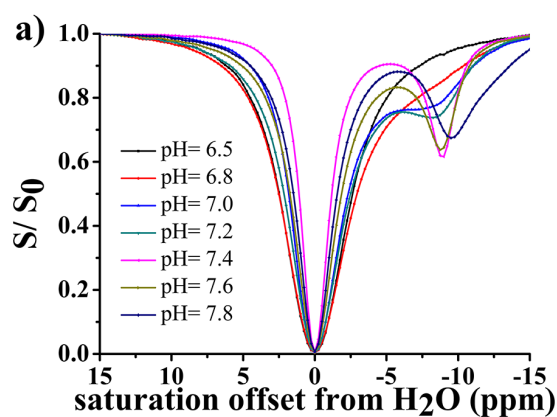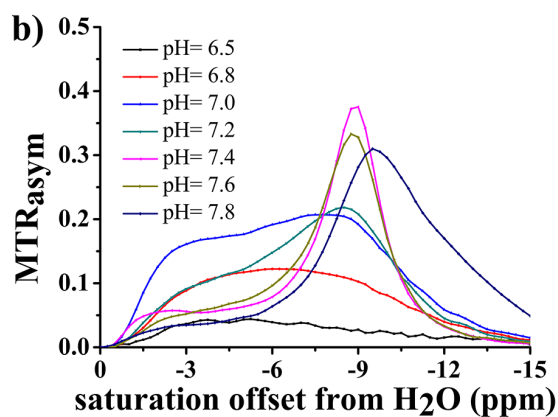

**Supporting Information Figure S4** Influence of pH on the contrast of uroporphyrin I ( $\omega_1 = 5.4 \mu\text{T}$ ,  $t_{\text{sat}} = 3 \text{ s}$ ,  $25 \text{ mM}$ ).

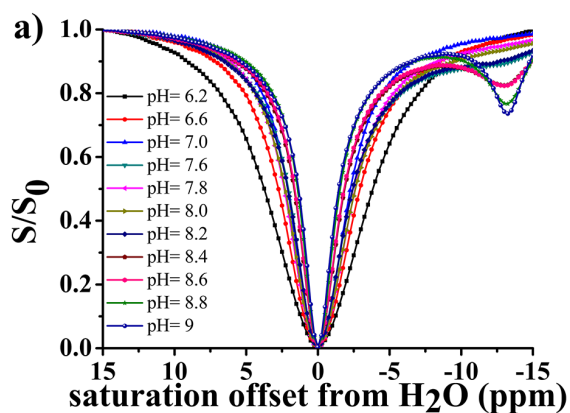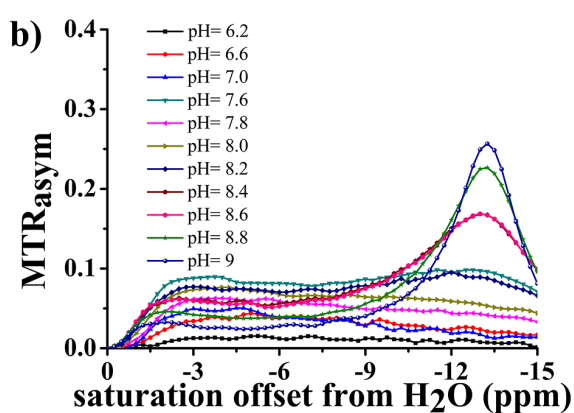

**Supporting Information Figure S5** Influence of pH on the contrast of coproporphyrin I ( $\omega_1 = 5.4 \mu\text{T}$ ,  $t_{\text{sat}} = 3 \text{ s}$ ,  $12.5 \text{ mM}$ ).

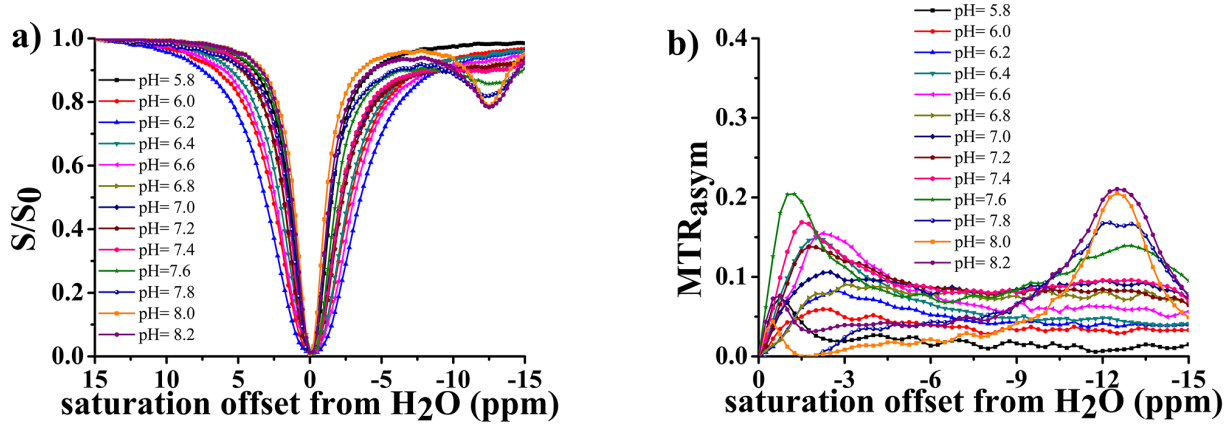

**Supporting Information Figure S6** pH effect on the contrast of hematoporphyrin ( $\omega_1 = 5.4 \mu\text{T}$ ,  $t_{\text{sat}} = 3 \text{ s}$ ,  $12.5 \text{ mM}$ ).

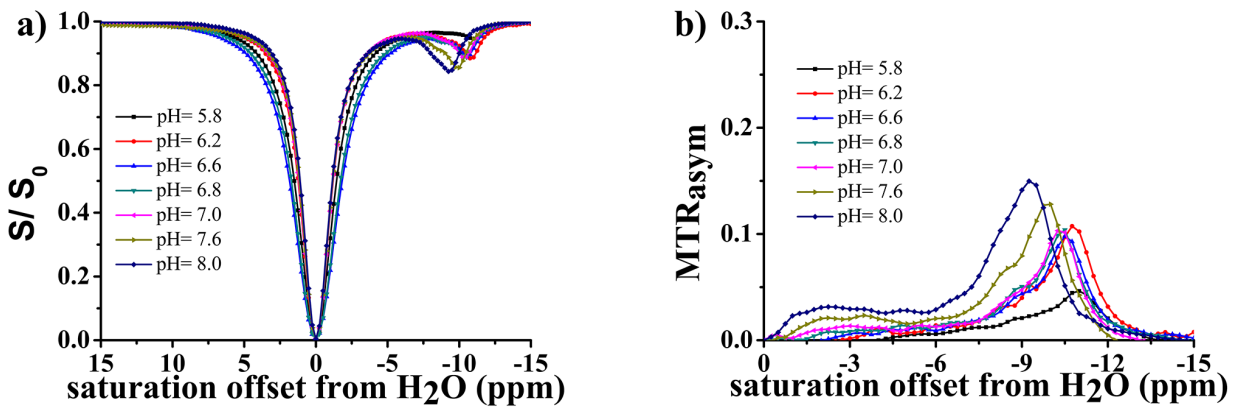

**Supporting Information Figure S7** Influence of pH on the contrast of Chlorin e6 ( $\omega_1 = 5.4 \mu\text{T}$ ,  $t_{\text{sat}} = 3 \text{ s}$ ,  $12.5 \text{ mM}$ ).

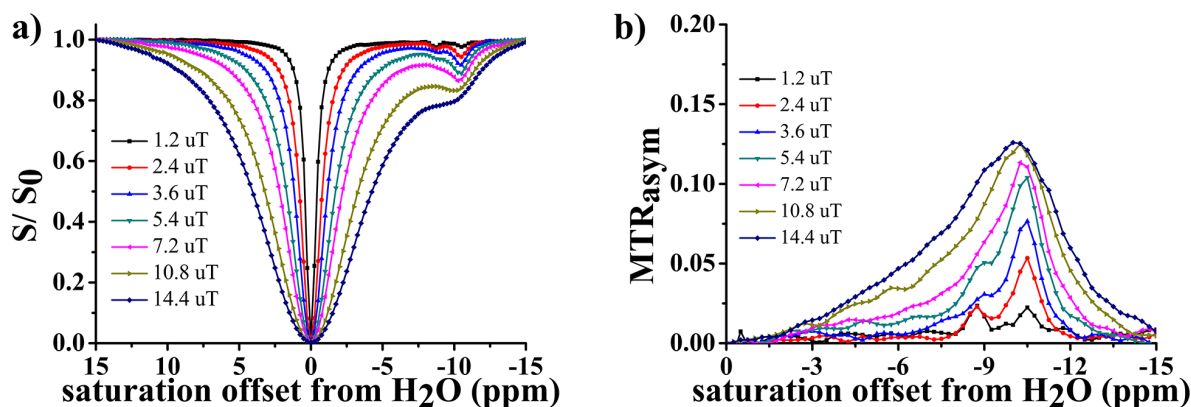

**Supporting Information Figure S8** Z-spectra and  $MTR_{\text{asym}}$  of Chlorin e6 using different saturation field strengths. The saturation power dependence of the contrast of Ce6 at pH 7.0 was measured using different saturation field strength. The Z-spectra and  $MTR_{\text{asym}}$  spectra using  $\omega_1 = 1.2 \mu\text{T}$ ,  $2.4 \mu\text{T}$ ,  $3.6 \mu\text{T}$ ,  $5.4 \mu\text{T}$ ,  $7.2 \mu\text{T}$ ,  $10.8 \mu\text{T}$  and  $11.4 \mu\text{T}$  were collected and are shown below. Two peaks were observed at  $-8.75 \text{ ppm}$  and  $-10.25 \text{ ppm}$  when weak saturation power ( $\omega_1 = 1.2 \mu\text{T}$ ,  $2.4 \mu\text{T}$ ,  $3.6 \mu\text{T}$  or  $5.4 \mu\text{T}$ ) was employed.

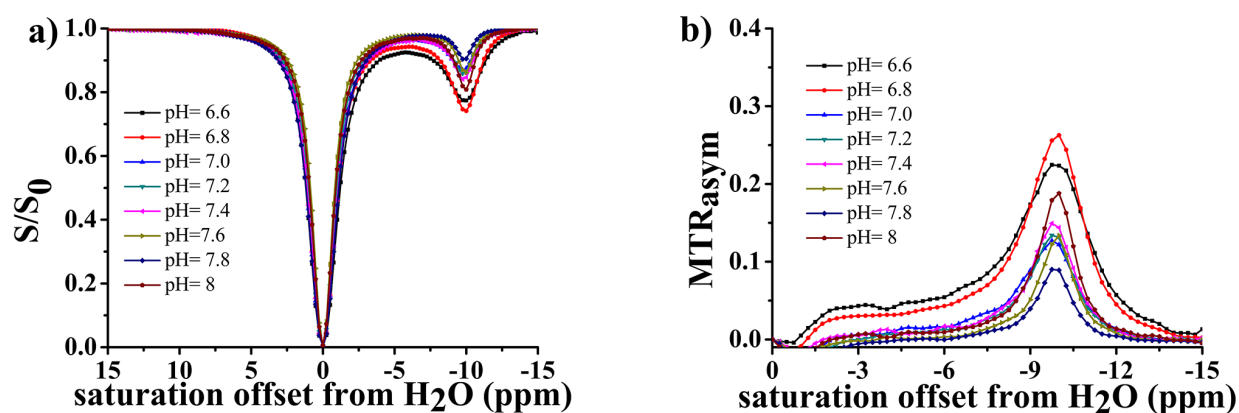

**Supporting Information Figure S9** Influence of pH on the contrast of TCPP ( $\omega_1 = 5.4 \mu\text{T}$ ,  $t_{\text{sat}} = 3 \text{ s}$ ,  $12.5 \text{ mM}$ ).

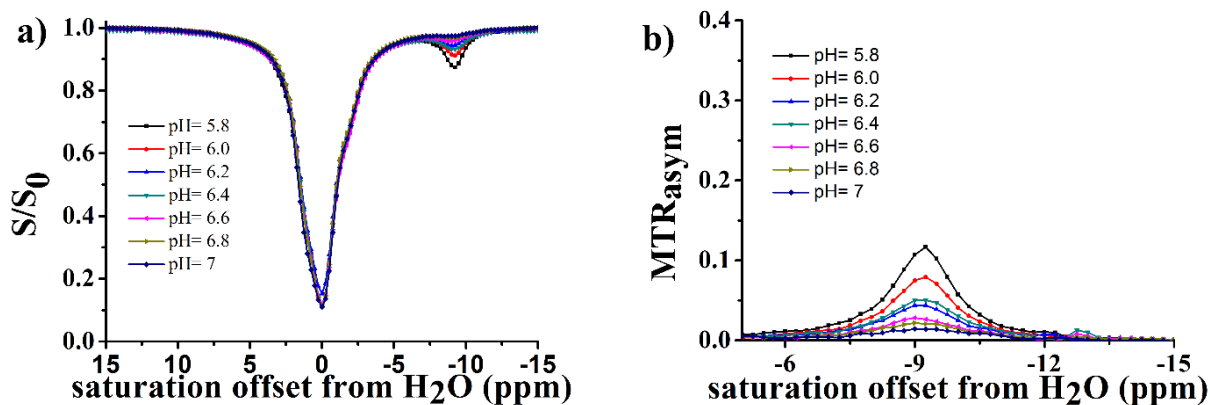

**Supporting Information Figure S10** Influence of pH on the contrast of TGPP complex ( $\omega_1 = 5.4 \mu T$ ,  $t_{sat} = 3$  s, 12.5 mM).

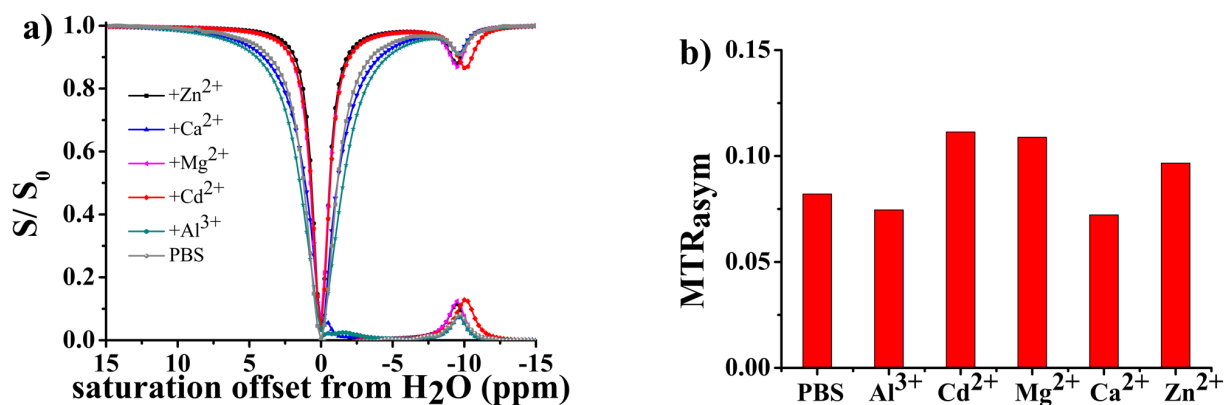

**Supporting Information Figure S11** CEST contrast of TPPS<sub>4</sub> in the presence of various metal ions (1 eq.). The effect of metal ions on the contrast of TPPS<sub>4</sub> were tested at a concentration of 12.5 mM, pH= 7,  $\omega_1 = 5.4 \mu T$ . After simply mixed metal ions with TPPS<sub>4</sub> solution at 37 °C for 4 h under constant shaking and titrated using high-concentration HCl/NaOH to neutral pH, the Z-spectra in presence of 1 eq. metal salts include  $ZnCl_2$ ,  $CaCl_2$ ,  $MgCl_2$ ,  $CdCl_2$  and  $AlCl_3$  were collected.

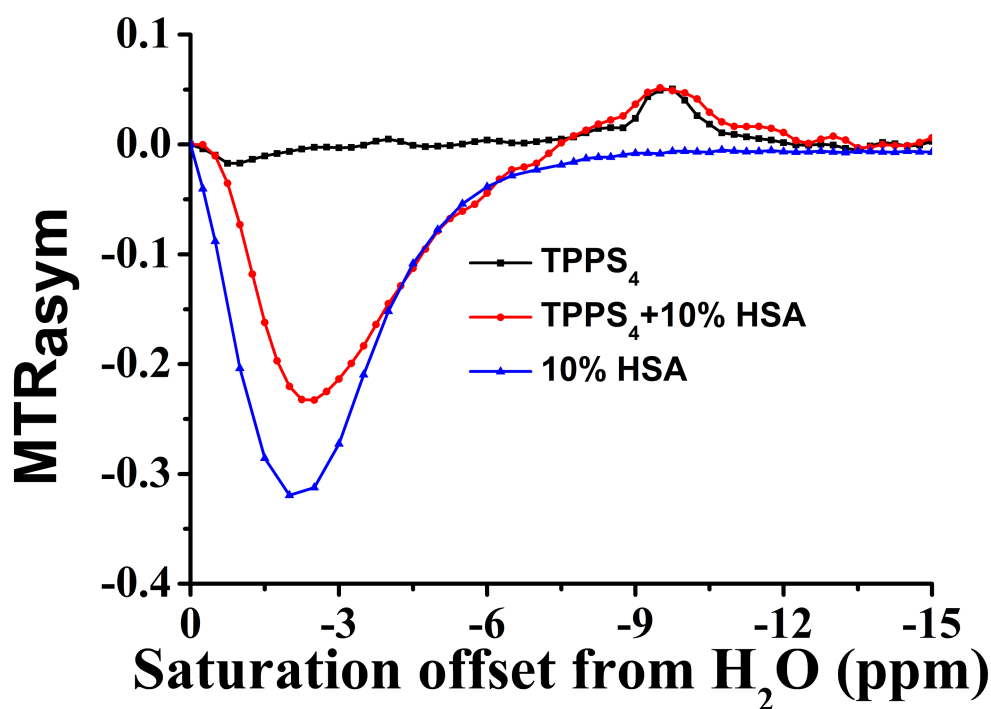

**Supporting Information Figure S12** In vitro test of TPPS<sub>4</sub> in the presence of 10% HSA (pH=7.3, 37 °C, 5.4 μT, 3 s for saturation).

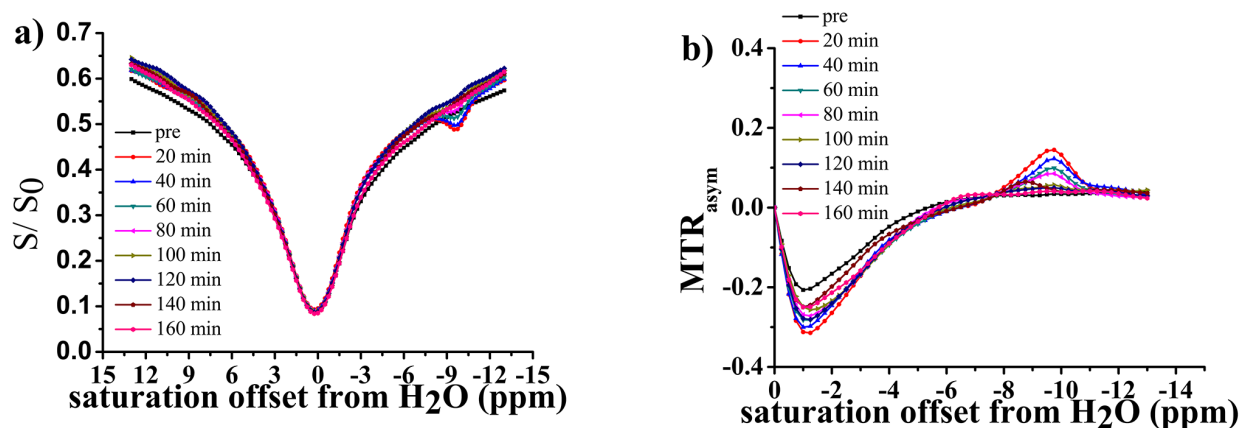

**Supporting Information Figure S13** In vivo Z-spectra and MTR<sub>asy</sub> spectra for the tumor of mouse 2 with data collected pre-injection and post injection. a) Z-spectra of tumor at different time points (pre, 20 min, 40 min, 60 min, 80 min, 100 min, 120 min, 140 min and 160 min); b) MTR<sub>asy</sub> of tumor at different time points. For these experiments, 50 μl of 0.1 M TPPS<sub>4</sub> solution was injected into mouse through

Intratumoral (IT) injections. Before injection, the  $B_0$  inhomogeneity was measured and corrected using the water saturation shift referencing approach. An 105-offset Z-spectrum (from 15 ppm to -15 ppm) was also acquired using saturation field strength of 3.6  $\mu$ T. For the dynamic CEST contrast measurements, a series of whole Z-spectra and water saturation shift referencing experiments were acquired after injection. The CEST contrast map was calculated by  $MTR_{asym}=[S(+\Delta\omega)-S(-\Delta\omega)]/S(+\Delta\omega)$ . The images at every three adjacent time points were averaged to increase the contrast-noise-ratio. The maximum CEST contrast at -9.75 ppm was up to 14.5% after injection of TPPS<sub>4</sub> and markedly decreased over 3 hours. The contrast map before and after injection are showed in Supporting Information Table S8 and S9.

75

76 **Supporting Information Table S1** Measured proton exchange rates of TPPS<sub>4</sub> at different pH values.

| pH      | QUESP fitting |
|---------|---------------|
| pH= 5.8 |               |
| pH=6.0  |               |

|         |                                                                                                                                      |
|---------|--------------------------------------------------------------------------------------------------------------------------------------|
| pH= 6.2 | 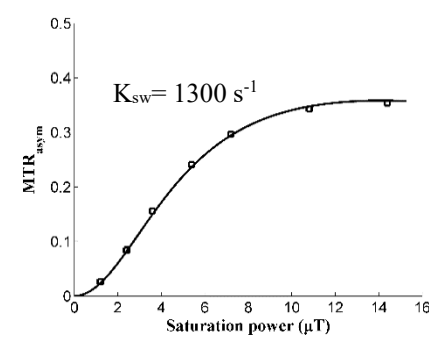 <p><math>K_{SW} = 1300 \text{ s}^{-1}</math></p>  |
| pH= 6.4 | 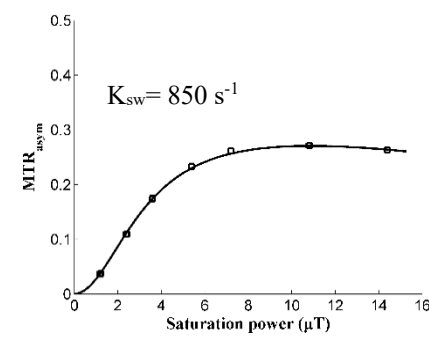 <p><math>K_{SW} = 850 \text{ s}^{-1}</math></p>   |
| pH= 6.6 | 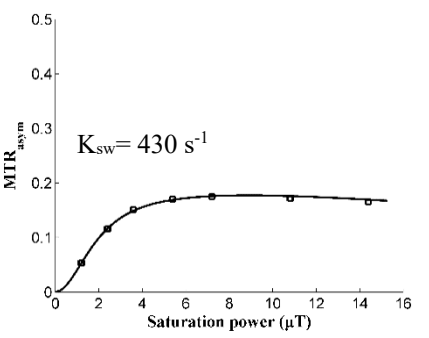 <p><math>K_{SW} = 430 \text{ s}^{-1}</math></p>  |
| pH= 6.8 | 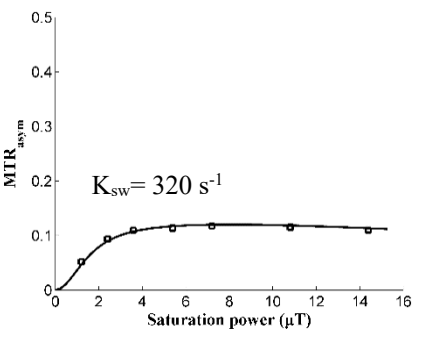 <p><math>K_{SW} = 320 \text{ s}^{-1}</math></p> |
|         |                                                                                                                                      |

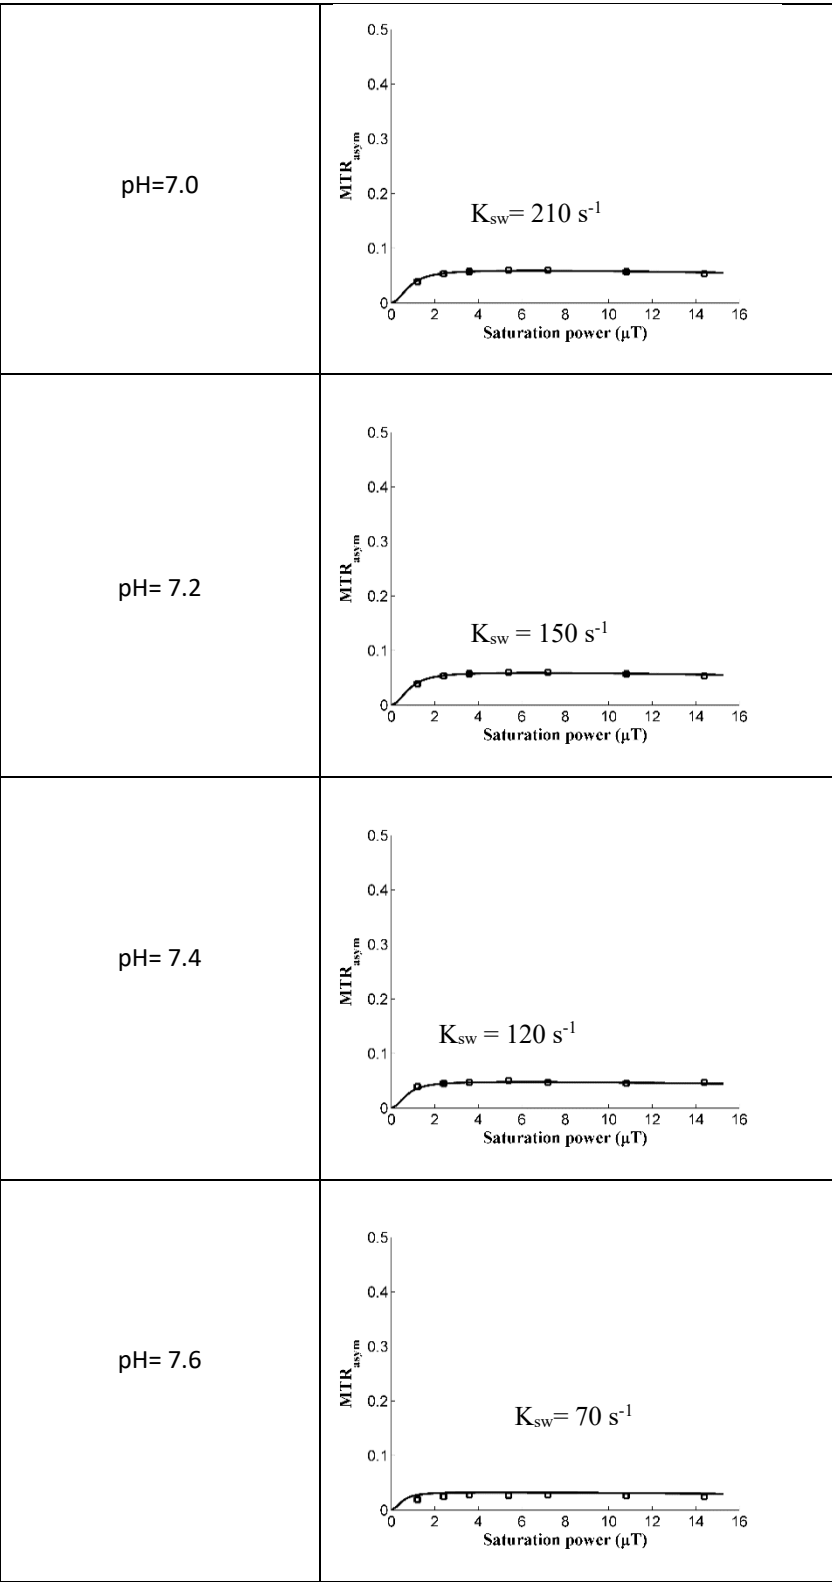

78 **Supporting Information Table S2** Measured proton exchange rates of uroporphyrin I at different pH  
 79 values.

| compound | QUESP fitting                                                                                                                       |
|----------|-------------------------------------------------------------------------------------------------------------------------------------|
| pH= 6.6  | 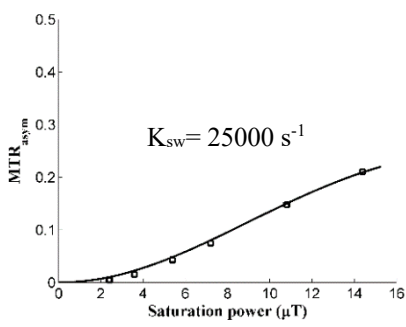 <p><math>K_{sw}= 25000\text{ s}^{-1}</math></p>  |
| pH=6.8   | 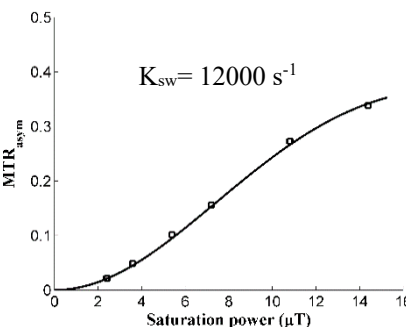 <p><math>K_{sw}= 12000\text{ s}^{-1}</math></p> |
| pH= 7.0  | 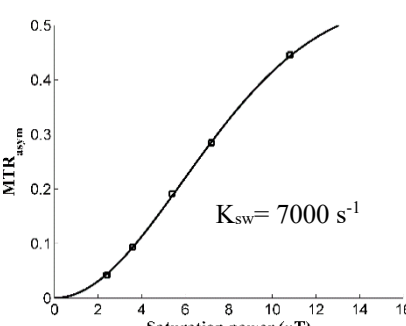 <p><math>K_{sw}= 7000\text{ s}^{-1}</math></p> |
| pH= 7.2  | 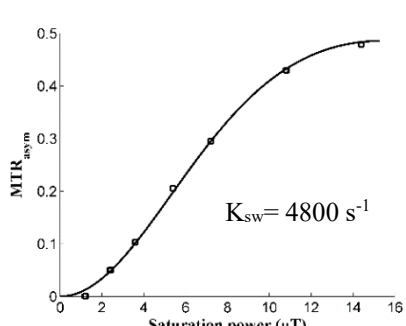 <p><math>K_{sw}= 4800\text{ s}^{-1}</math></p> |
|          |                                                                                                                                     |

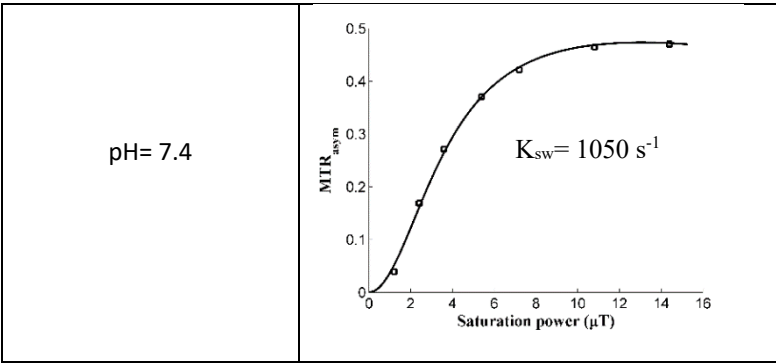

**Supporting Information Table S3** Measured proton exchange rates of coproporphyrin I at different pH.

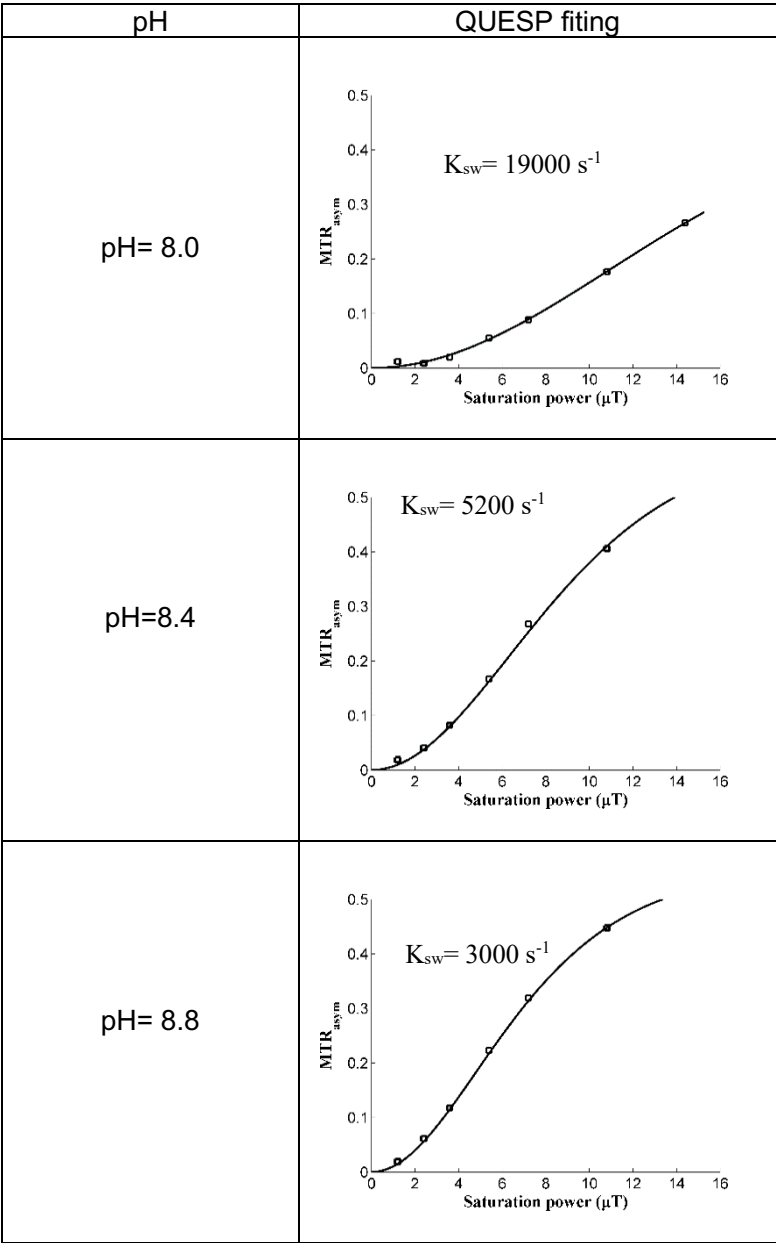

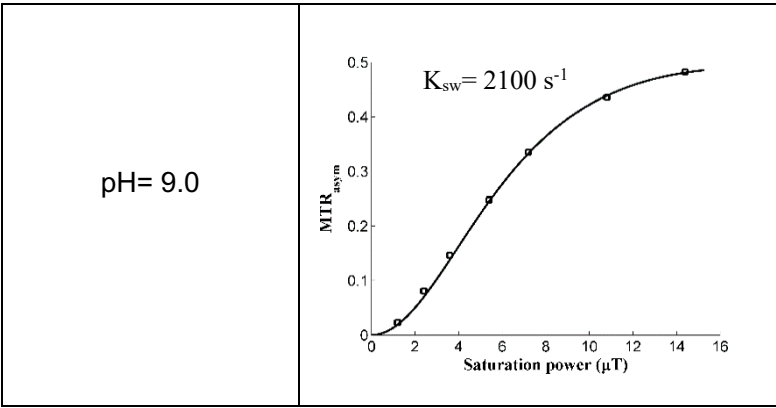

**Supporting Information Table S4** Measured proton exchange rates of hematoporphyrin at different pH.

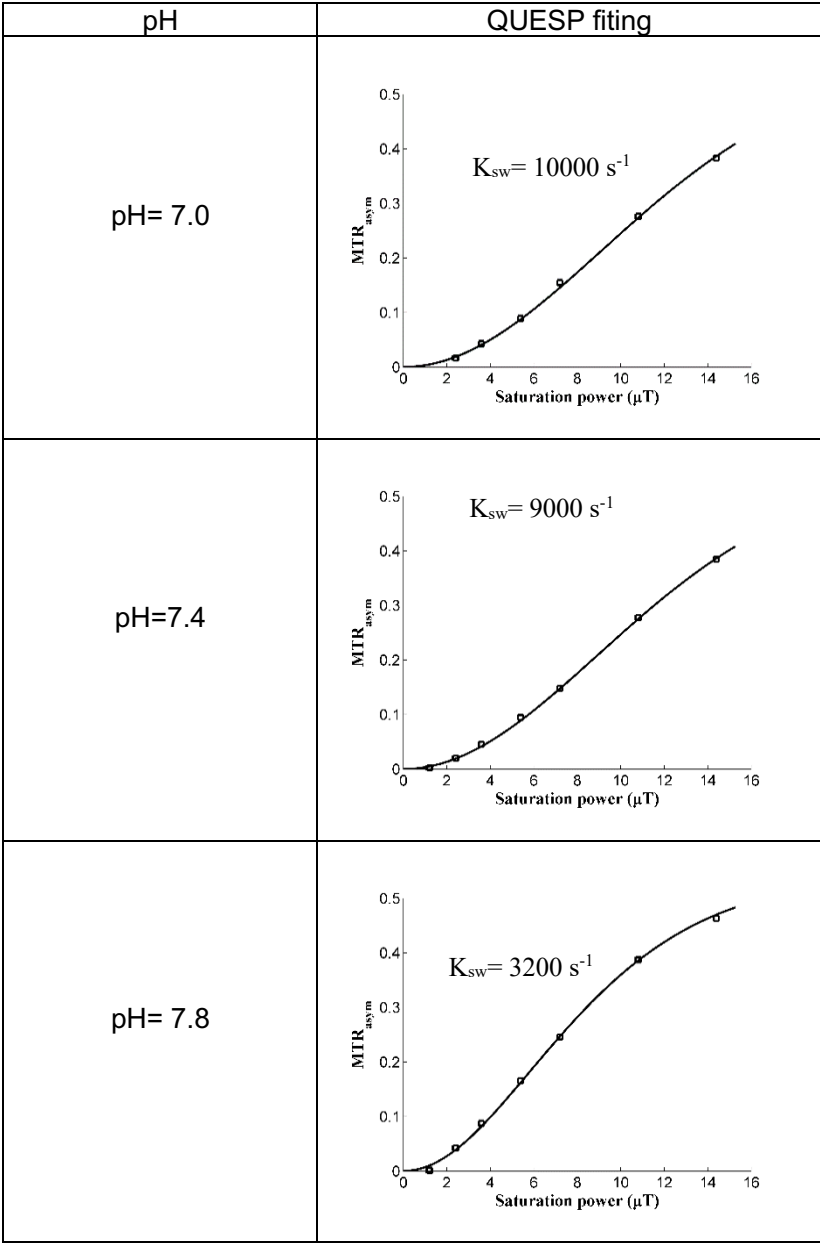

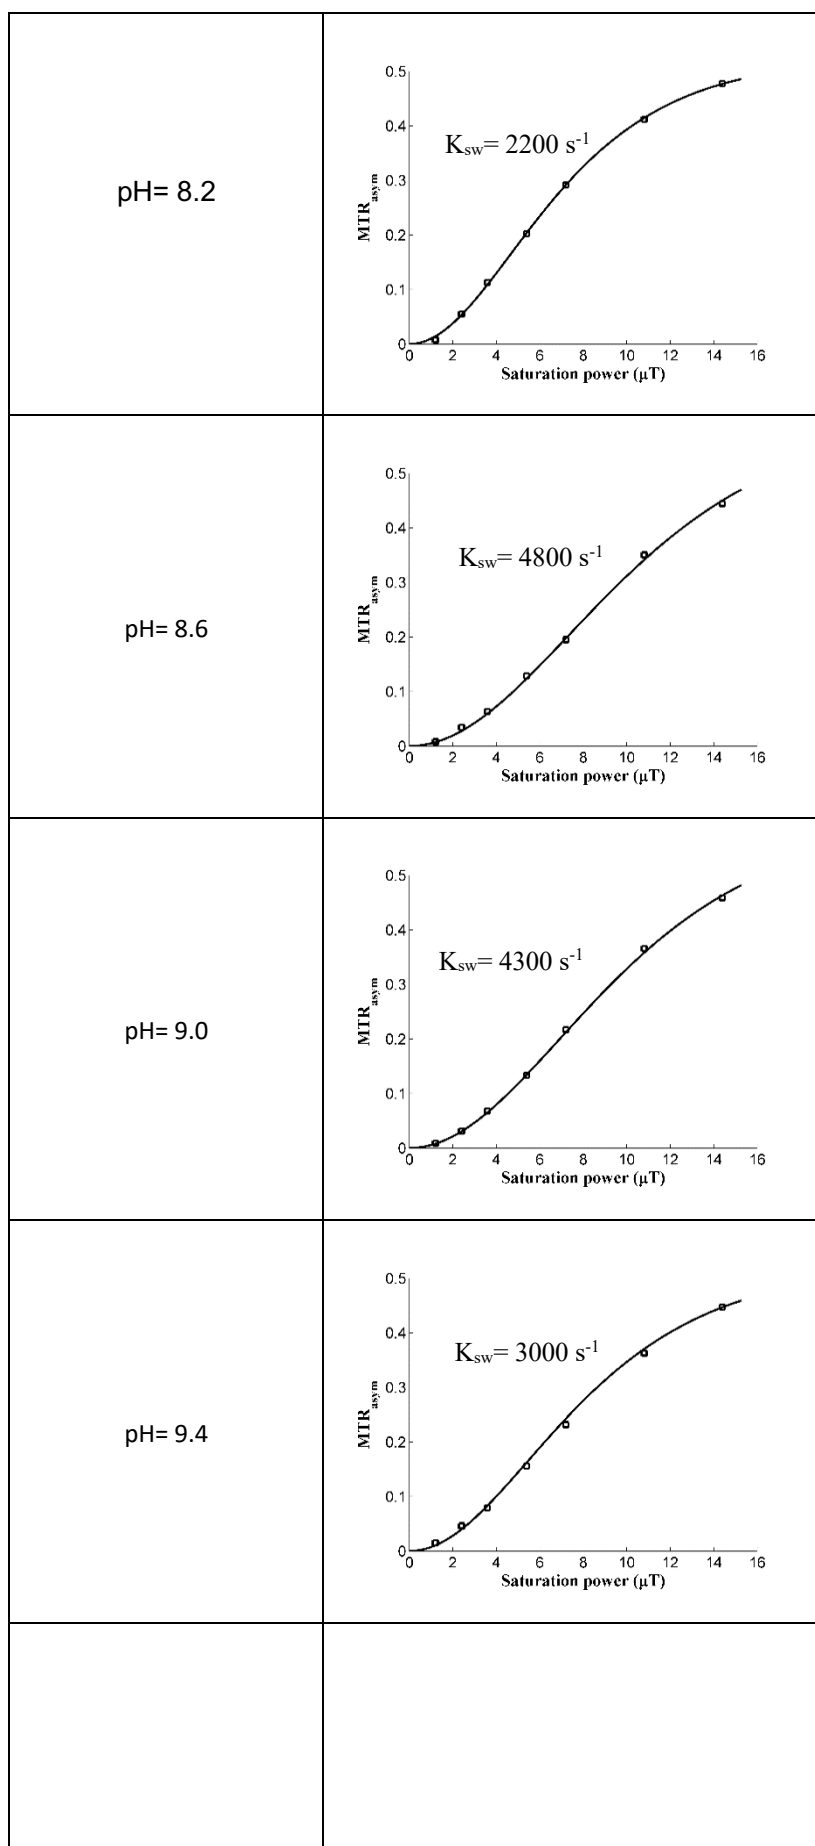

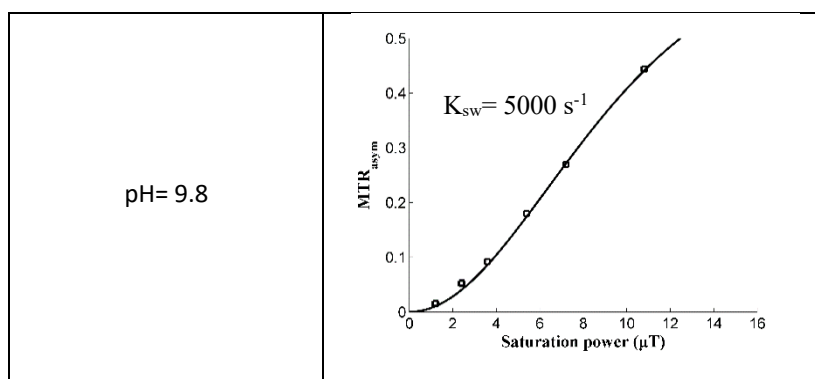

**Supporting Information Table S5** Measured proton exchange rates of Ce6 at different pH.

| pH  |  | Peak at -10.25 ppm                               | Peak at -8.75 ppm                               |
|-----|--|--------------------------------------------------|-------------------------------------------------|
| 6.6 |  | <p><math>K_{sw} = 650 \text{ s}^{-1}</math></p>  | <p><math>K_{sw} = 160 \text{ s}^{-1}</math></p> |
| 7   |  | <p><math>K_{sw} = 850 \text{ s}^{-1}</math></p>  | <p><math>K_{sw} = 200 \text{ s}^{-1}</math></p> |
| 7.4 |  | <p><math>K_{sw} = 1000 \text{ s}^{-1}</math></p> | <p><math>K_{sw} = 250 \text{ s}^{-1}</math></p> |

**Supporting Information Table S6** Measured proton exchange rates of TCPP at different pH.

| pH | QUESP fitting |
|----|---------------|
|----|---------------|

|         |                                                                                                                                       |
|---------|---------------------------------------------------------------------------------------------------------------------------------------|
| pH= 6.6 | 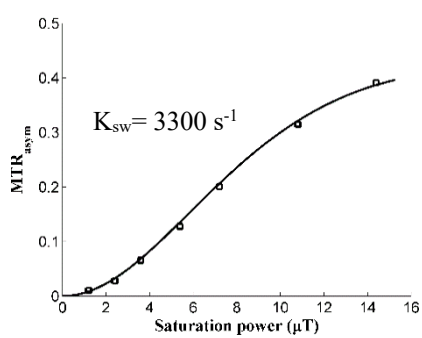 <p><math>K_{sw} = 3300 \text{ s}^{-1}</math></p>   |
| pH=6.8  | 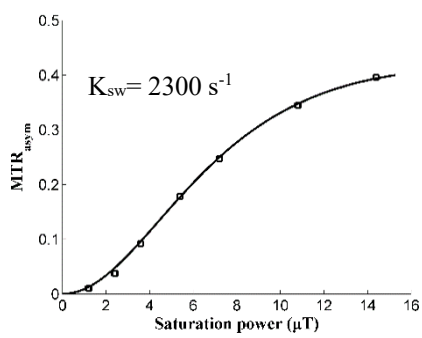 <p><math>K_{sw} = 2300 \text{ s}^{-1}</math></p>   |
| pH= 7.0 | 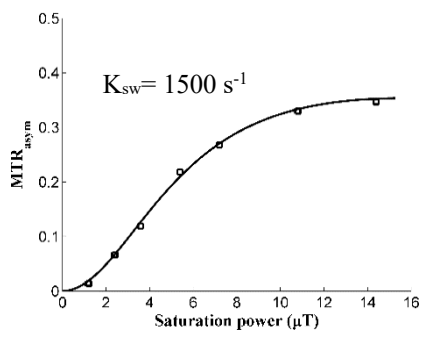 <p><math>K_{sw} = 1500 \text{ s}^{-1}</math></p>  |
| pH= 7.2 | 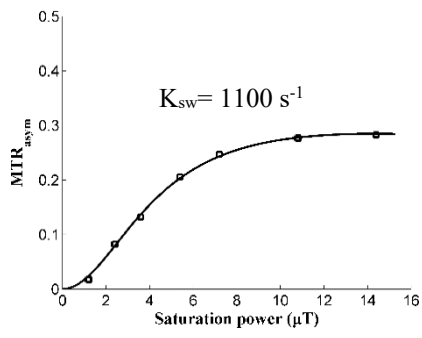 <p><math>K_{sw} = 1100 \text{ s}^{-1}</math></p> |
|         |                                                                                                                                       |

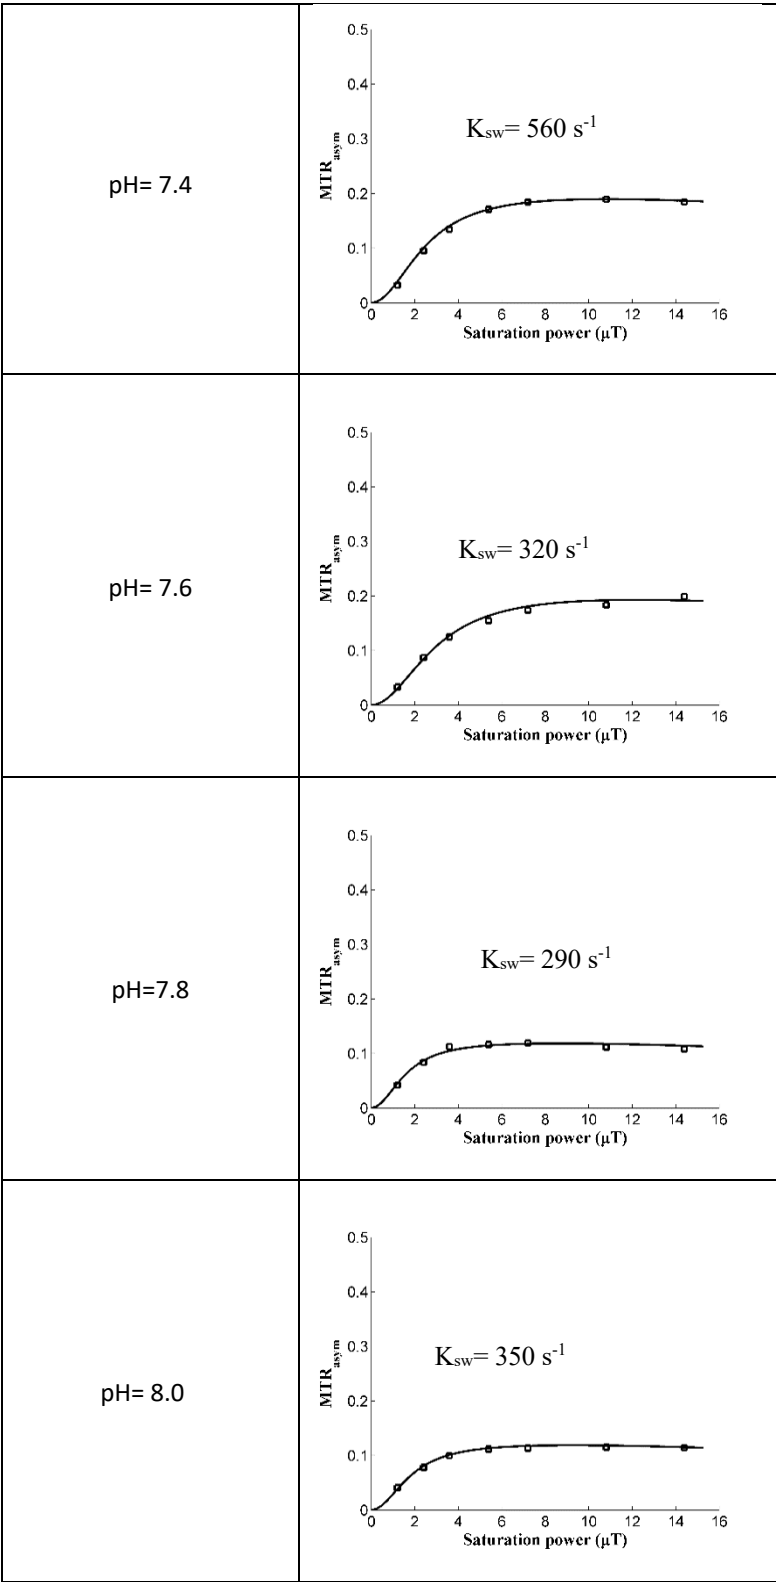

95  
96  
97  
98

99      **Supporting Information Table S7** Measured proton exchange rates of TGPP at different pH.

| pH      | QUESP fitting                                                                                                                      |
|---------|------------------------------------------------------------------------------------------------------------------------------------|
| pH= 5.8 | 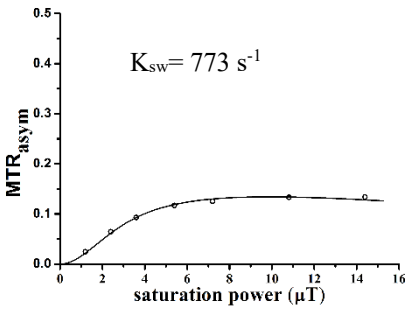 <p><math>K_{sw}= 773\text{ s}^{-1}</math></p>   |
| pH=6.0  | 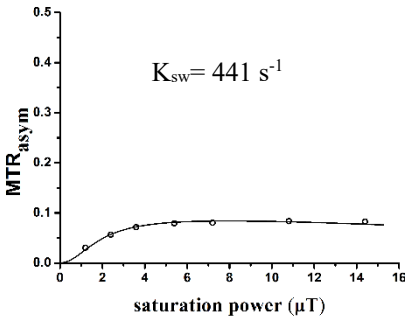 <p><math>K_{sw}= 441\text{ s}^{-1}</math></p>  |
| pH= 6.2 | 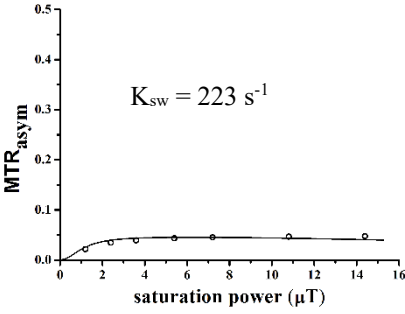 <p><math>K_{sw}= 223\text{ s}^{-1}</math></p> |
| pH= 6.4 | 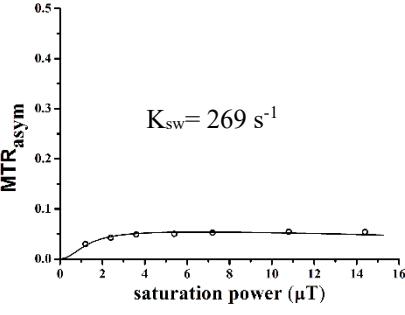 <p><math>K_{sw}= 269\text{ s}^{-1}</math></p> |
|         |                                                                                                                                    |

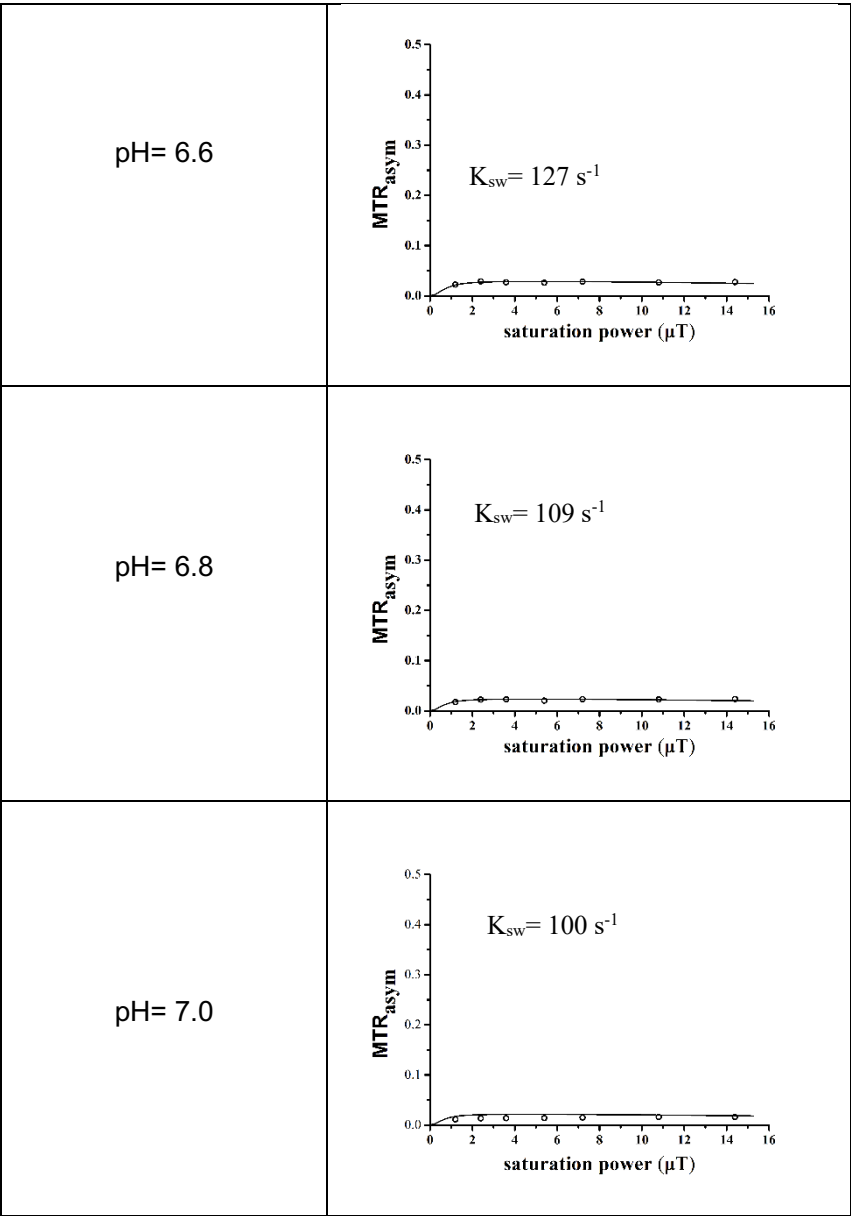

**Supporting Information Table S8**  $T_{2w}$  map and CEST contrast map of Mouse 1 and Mouse 2.

|              | Mouse 1 | Mouse 2 |
|--------------|---------|---------|
| $T_{2w}$ map |         |         |

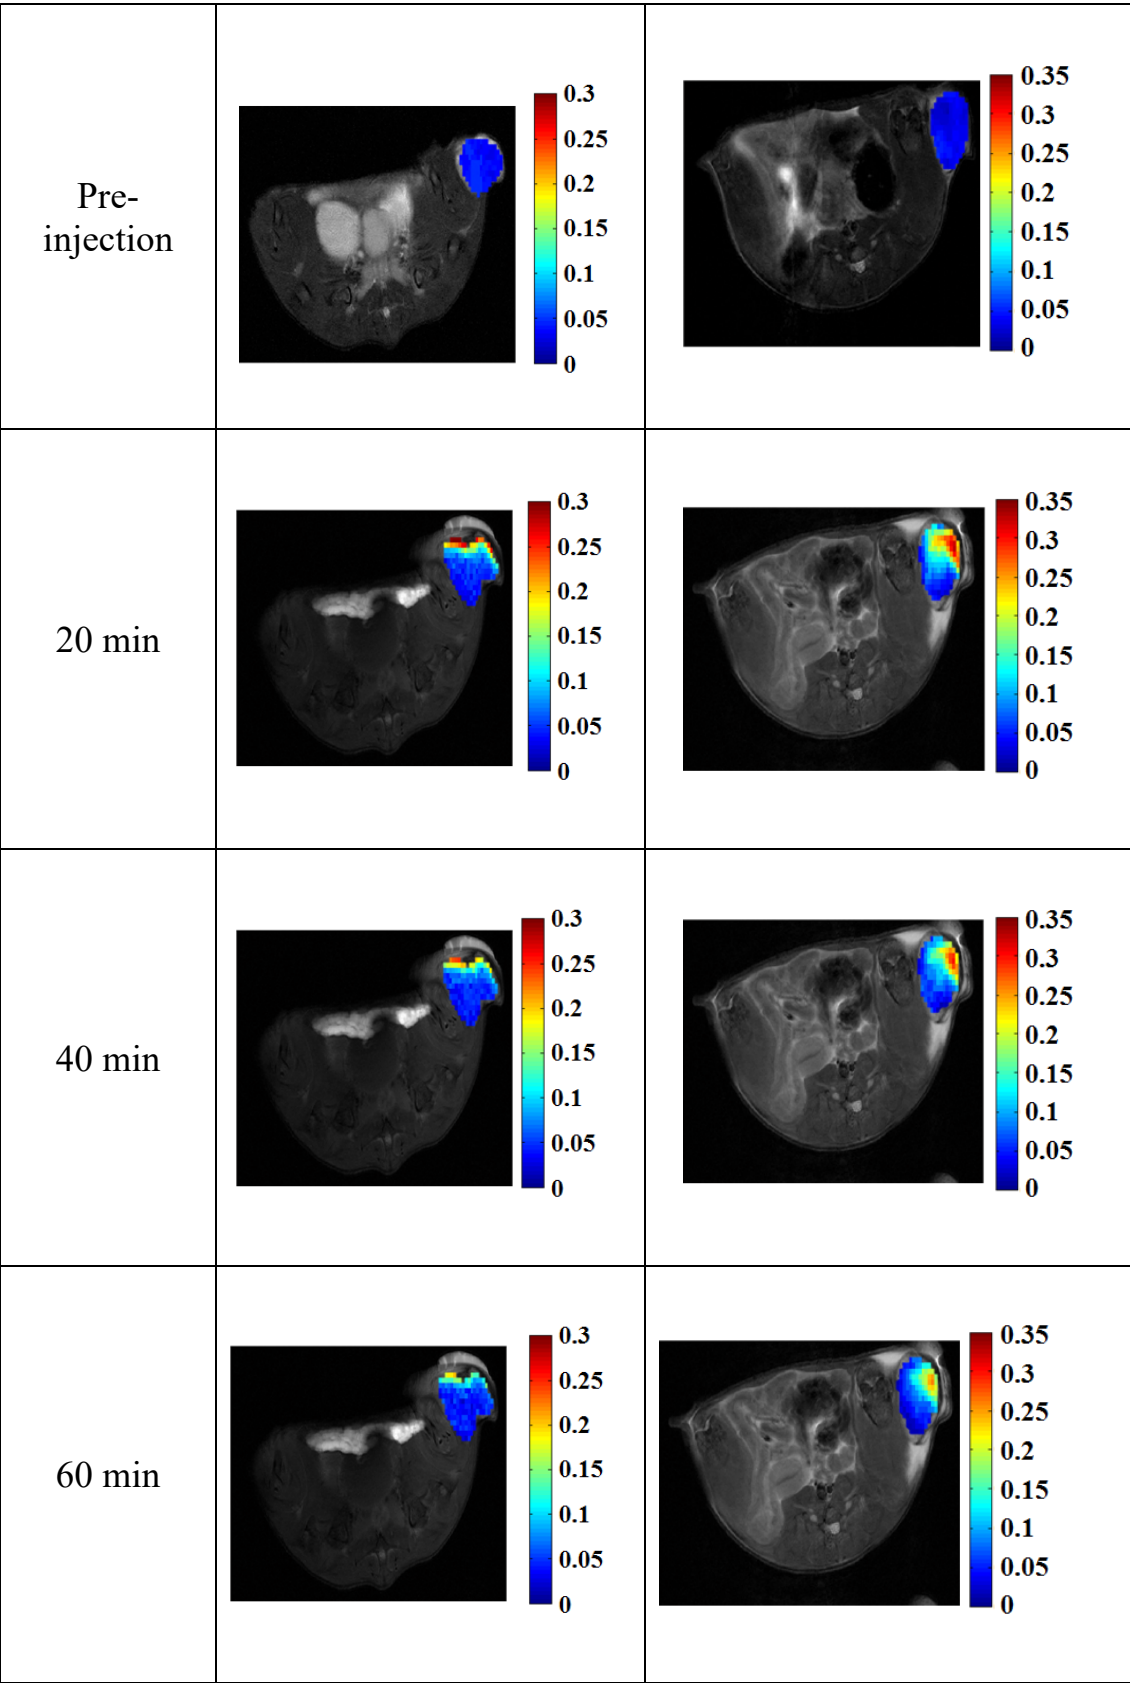

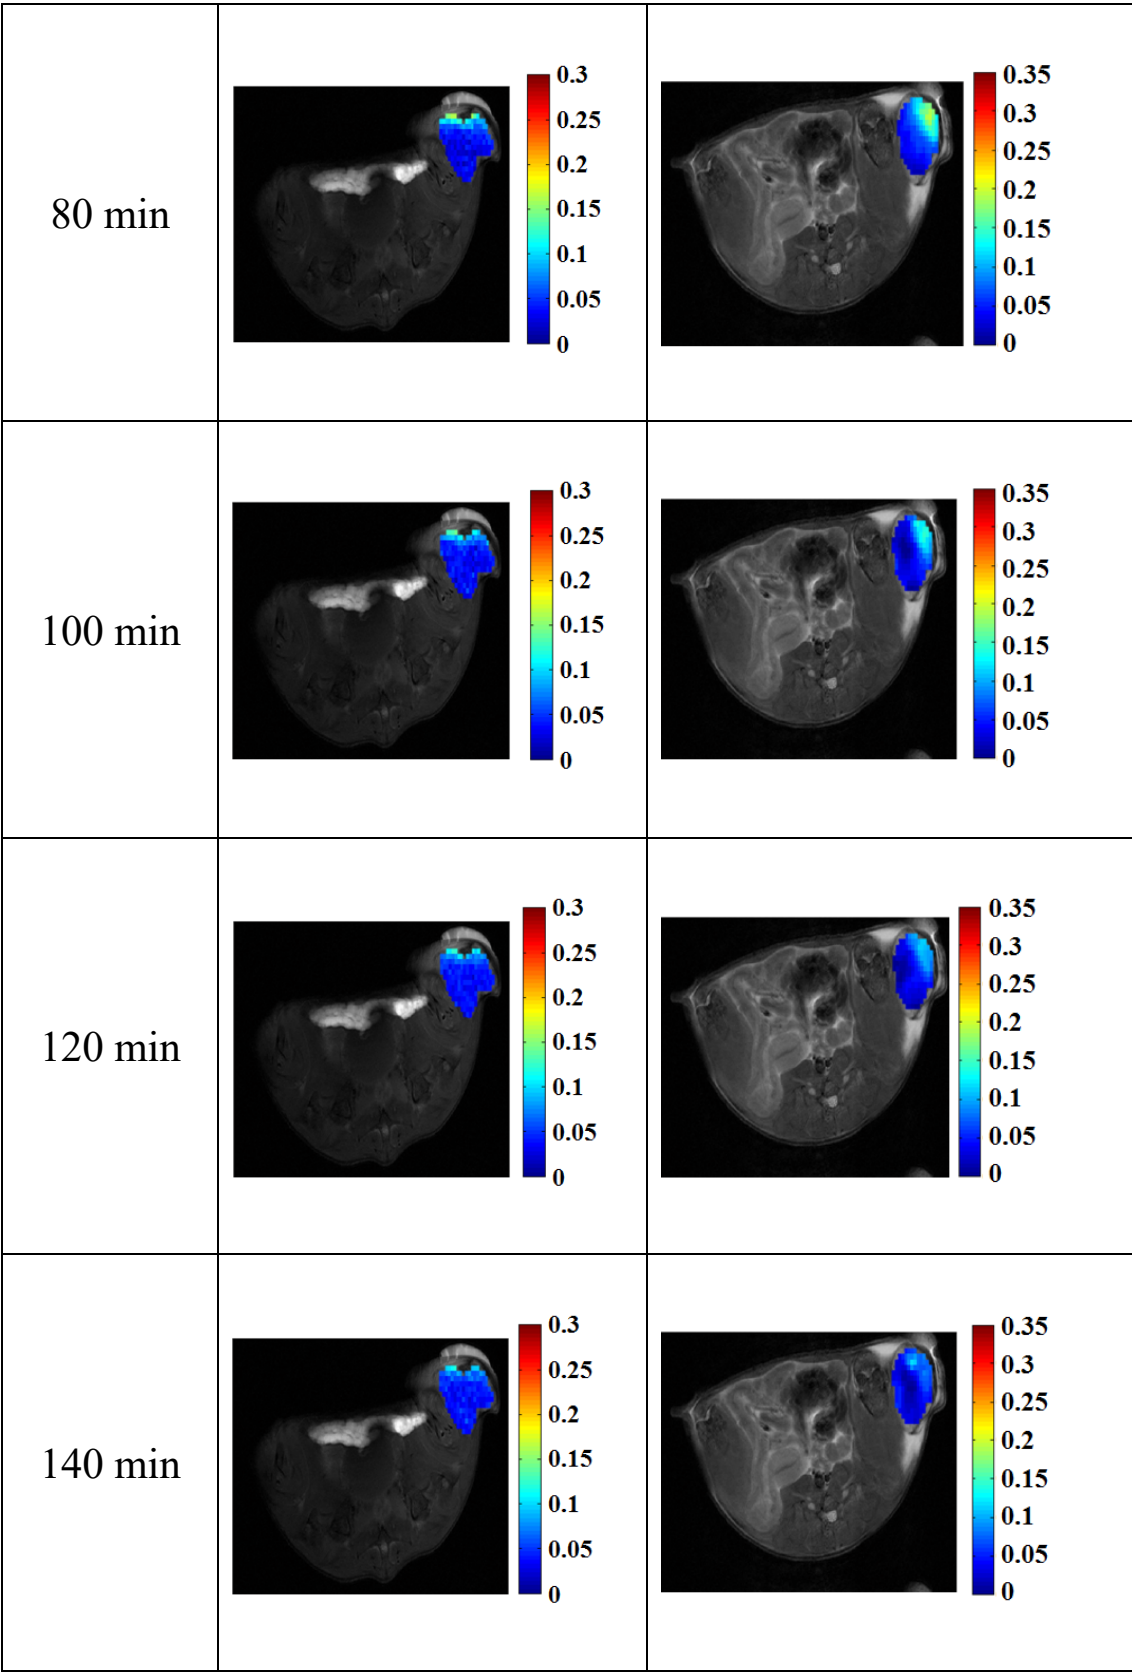

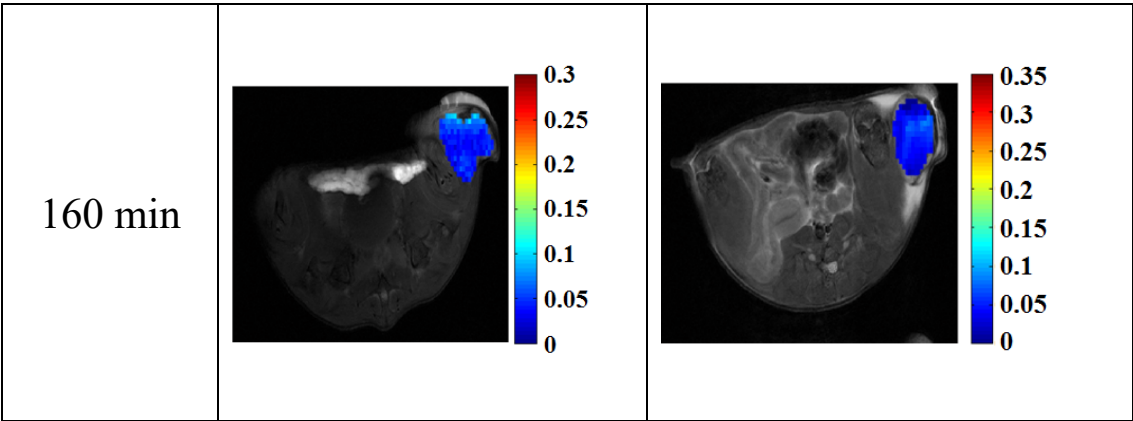

**Supporting Information Table S9**  $T_{2w}$  map and CEST contrast map of Mouse 3 and Mouse 4.

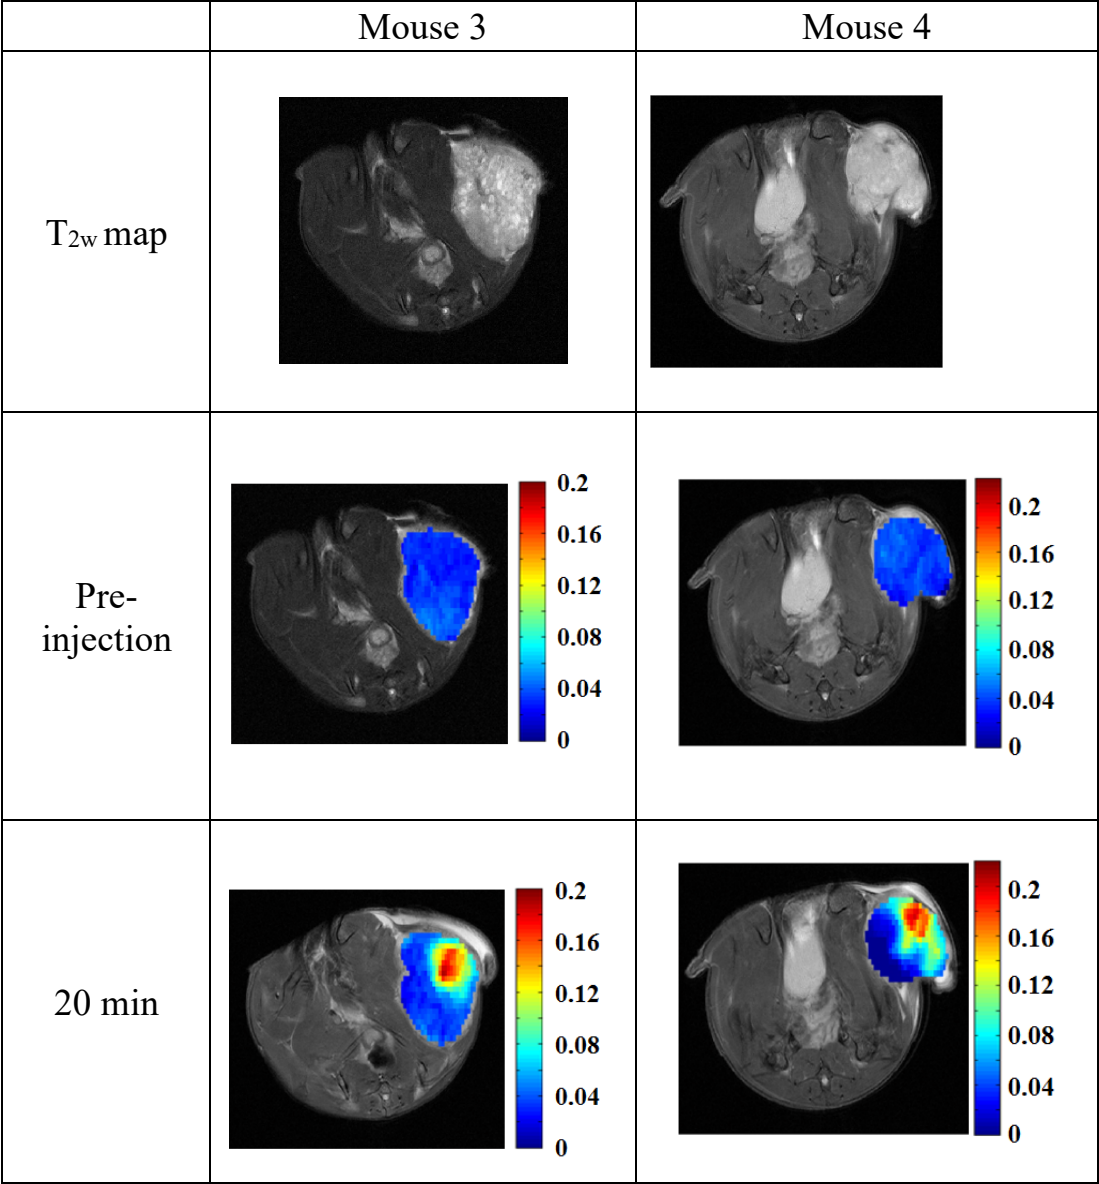

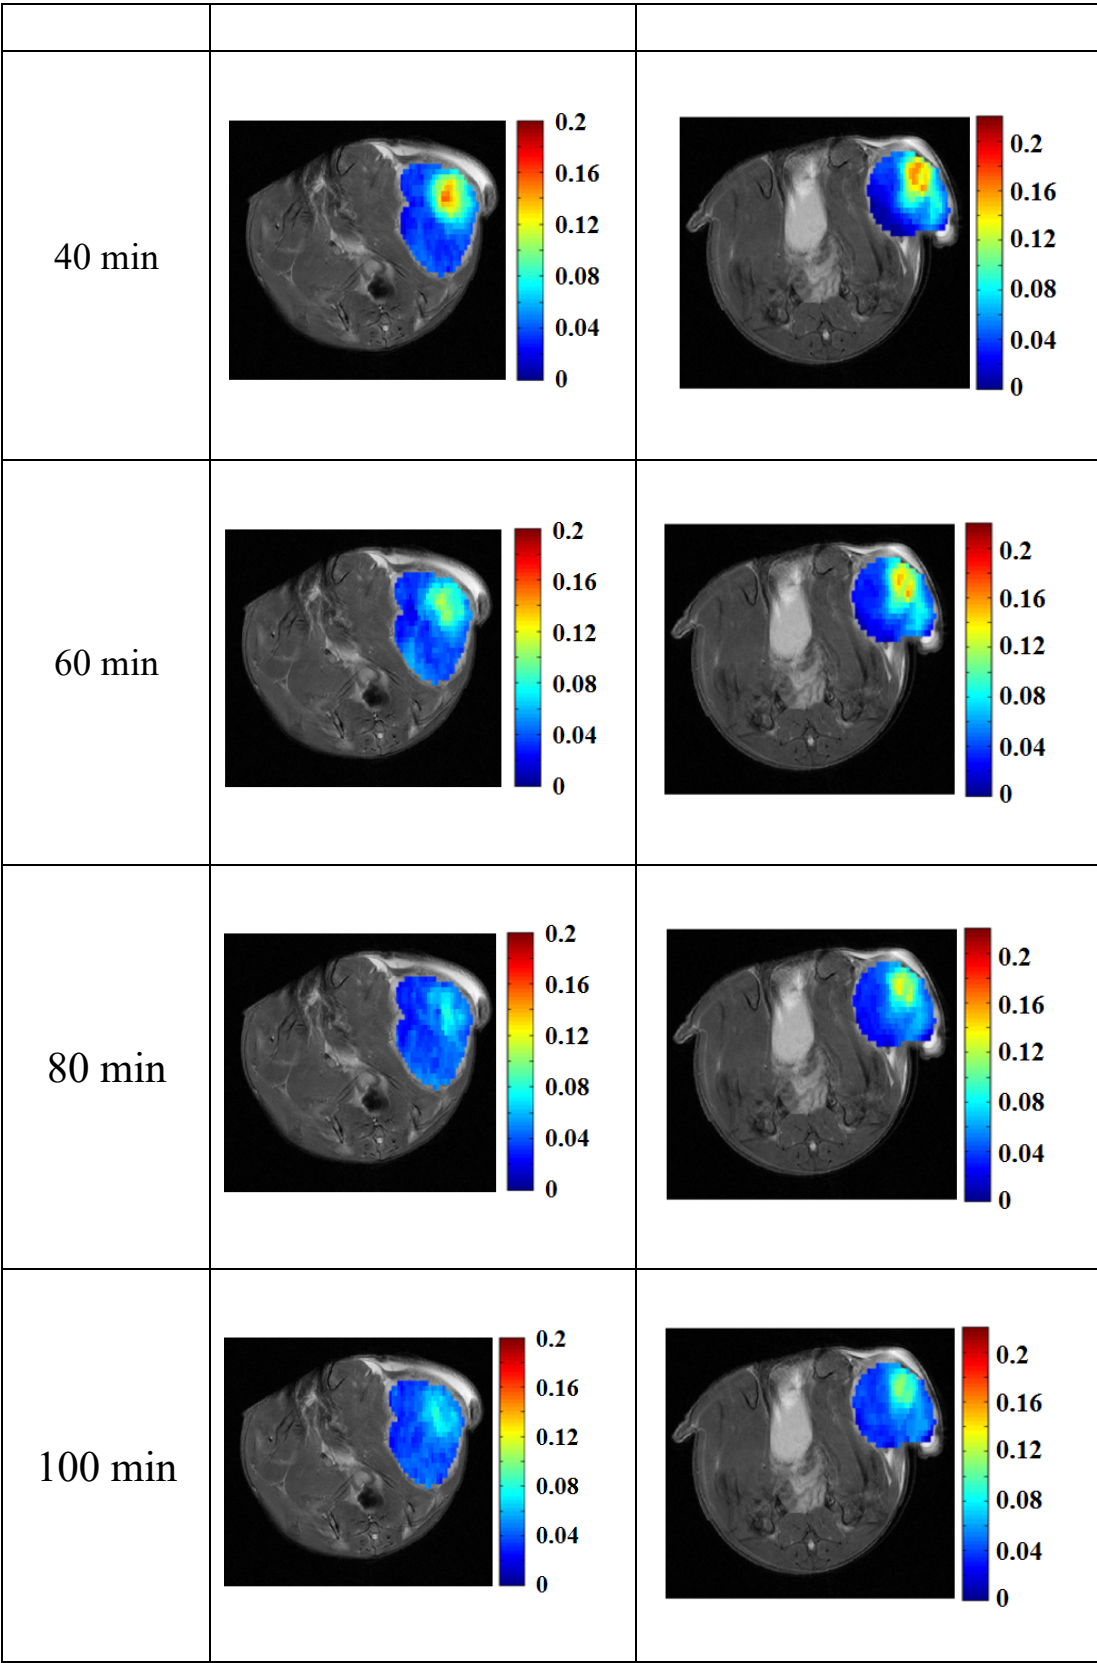

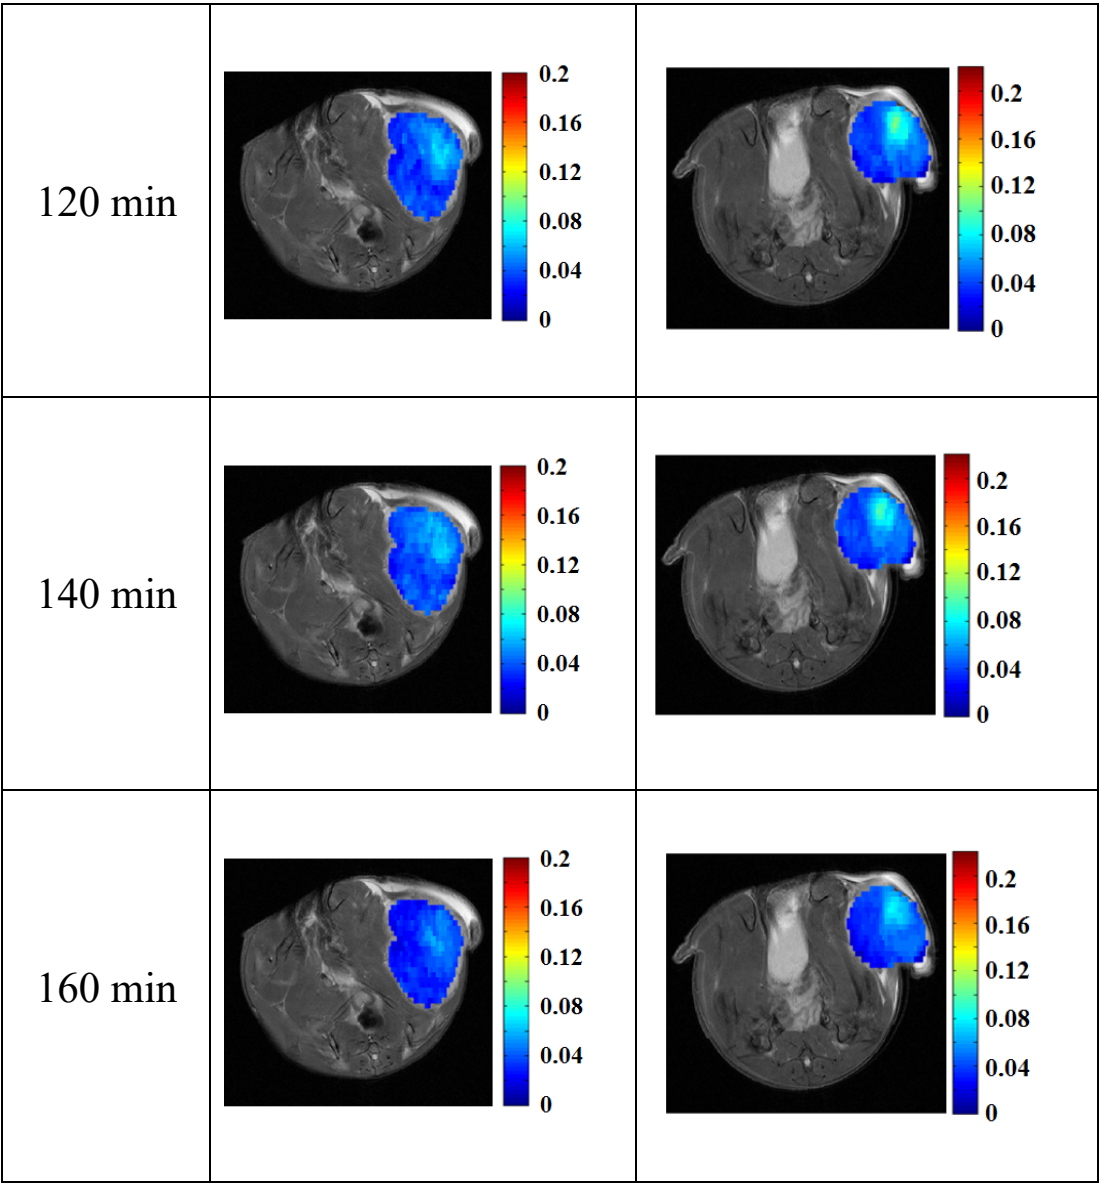

08  
09  
10  
11  
12  
13  
14
